# Supplementary material for: Antioxidant Green Factories: Toward Sustainable Production of Vitamin E in Plant In Vitro Cultures
Source: PubMed Central journal article supplement — ACS Omega. 2023 Jan 13;8(4):3586–605. doi: 10.1021/acsomega.2c05819 (PMC9893489; doi:10.1021/acsomega.2c05819), 2023-01-13
Supplement: ao2c05819_si_001.pdf [file ao2c05819_si_001.pdf]

## Supporting Information

### Antioxidant green-factories: Towards sustainable production of vitamin E in plant *in vitro* cultures

M Vidya Muthulakshmi, Aparajitha Srinivasan<sup>1</sup>, Smita Srivastava\*

Department of Biotechnology, Bhupat & Jyoti Mehta School of Biosciences,

Indian Institute of Technology Madras (IIT Madras), Chennai-600 036, Tamil Nadu, India;

\*Corresponding author: Prof. Smita Srivastava

E-mail: [smita@iitm.ac.in](mailto:smita@iitm.ac.in);

Tel: [91-44-22574127](tel:91-44-22574127)

Fax: [91-44-22274102](tel:91-44-22274102)

---

<sup>1</sup> Present address: Berkeley Lab, Emeryville, California 94608, United States

**Table 1. Plant metabolic model reconstructions and their applications**

| <b>Species</b>                       | <b>Reconstructed model</b>                                                                                       | <b>Objective function (Modeling approach)</b>                                        | <b>Applications</b>                                                                                                                                                                                                           |
|--------------------------------------|------------------------------------------------------------------------------------------------------------------|--------------------------------------------------------------------------------------|-------------------------------------------------------------------------------------------------------------------------------------------------------------------------------------------------------------------------------|
| <i>Arabidopsis thaliana</i>          | Heterotrophic cell culture <sup>1,2,3</sup>                                                                      | Minimize total reaction flux (FBA)                                                   | Predicting metabolic capabilities under heterotrophy, elevated temperature and hyperosmosis                                                                                                                                   |
|                                      | AraGEM <sup>4</sup>                                                                                              | Minimize uptake of photon/sucrose (FBA)                                              | Predicting metabolic capabilities under photosynthesis, photorespiration and heterotrophy                                                                                                                                     |
|                                      | Improved AraGEM and C4GEM <sup>5</sup>                                                                           | Maximize (separately) CO <sub>2</sub> fixation and biomass synthesis (FBA)           | Comparative analysis of the effect of gene knockouts, light intensity and CO <sub>2</sub> concentration between C3 and C4 plants                                                                                              |
|                                      | Compartmentalized and photosynthetic / heterotrophic tissue-specific models <sup>6</sup>                         | Minimization of flux difference (MoMA/ROOM)                                          | Assessment of metabolic behavior of various tissue types with integration of omics data, predicting flux distribution following gene knockout, Metabolic engineering strategies (knockout targets) for vitamin E biosynthesis |
|                                      | Bottom-up metabolic reconstruction- AraCore <sup>7</sup>                                                         | Maximize biomass and energy efficiency (FBA)                                         | Carbon utilization under normal, carbon-and nitrogen-limiting conditions, estimation of metabolic cost for enzyme production                                                                                                  |
| <i>Oryza sativa</i> (Rice)           | Photoautotrophic model based on RiceCyc <sup>8</sup>                                                             | Minimize total reaction flux (FBA)                                                   | Predicting flux distributions in response to varying light intensity                                                                                                                                                          |
|                                      | Central metabolic/regulatory network model representing germinating seeds and photorespiring leaves <sup>9</sup> | Maximize biomass (FBA) followed by Flux variability analysis (FVA)                   | Predicting phenotypic and metabolic states of cells under anaerobic conditions and photorespiration (simulating flooding and drought stress)                                                                                  |
|                                      | Improved genome-scale model iOS2164 <sup>10</sup>                                                                | Maximize biomass (FBA) followed by random sampling                                   | Understanding metabolic and regulatory states in response to light by integrating multi-omics data with constraint-based analysis                                                                                             |
| <i>Solanum lycopersicum</i> (Tomato) | Medium-scale central metabolic flux model of tomato fruit, constrained with experimental data <sup>11</sup>      | Minimization of sum of the fluxes (FBA)                                              | Understanding metabolic changes in developing tomato fruit                                                                                                                                                                    |
|                                      | Genome-scale metabolic model of tomato leaf-iHY3410 <sup>12</sup>                                                | Minimize total reaction flux (FBA) followed by max/min of individual reactions (FVA) | Investigating the photorespiratory metabolism (metabolic response to drought stress) and reaction essentiality analysis.                                                                                                      |

|                                         |                                                                                                                        |                                                                                               |                                                                                                                                                                                              |
|-----------------------------------------|------------------------------------------------------------------------------------------------------------------------|-----------------------------------------------------------------------------------------------|----------------------------------------------------------------------------------------------------------------------------------------------------------------------------------------------|
| <b>C4GEM</b>                            | Multi-tissue models of maize, sugarcane and wheat <sup>13</sup>                                                        | Minimize photon uptake (FBA)                                                                  | Capturing interaction between mesophyll and bundle sheath cells in C4 photosynthesis.                                                                                                        |
| <b><i>Zea mays</i> (Maize)</b>          | iRS1563 <sup>14</sup>                                                                                                  | Maximize biomass (FBA)                                                                        | Predicting metabolic capabilities under photosynthesis, photorespiration and respiration                                                                                                     |
|                                         | Compartmentalized leaf genome-scale model<br>a. Maize <sup>15</sup><br>b. Maize <sup>16</sup>                          | a. Flux-sum analysis (FBA) followed by FVA<br>b. Maximum rate of sucrose export (FBA)         | Constraint-based analysis of GSM integrated with<br>a. Transcriptome and proteome data under nitrogen-limitation<br>b. Metabolomics and enzyme activity data to investigate yield of kernels |
| <b><i>Hordeum vulgare</i> (Barley)</b>  | Central metabolic network of developing endosperm <sup>17</sup>                                                        | Maximization of growth (FBA) followed by minimization of overall flux (Quadratic programming) | Metabolic flux distribution under anoxic, hypoxic, aerobic and enzyme deletion conditions                                                                                                    |
|                                         | Multiscale metabolic modeling by integrating static organ-specific models with dynamic whole-plant model <sup>18</sup> | Minimize carbon source uptake followed by minimization of overall flux (FBA-static part)      | Dynamic FBA (dFBA) to analyze source-sink interactions during barley seed development                                                                                                        |
| <b><i>Brassica napus</i> (Rapeseed)</b> | Compartmentalized model of central metabolism <sup>19</sup>                                                            | Maximize biomass (FBA)                                                                        | Simulation of seed growth at various oil accumulation stages and insights into network plasticity by FBA, principal component analysis and reaction deletion studies.                        |
|                                         | Metabolic network model of seed storage metabolism in developing embryos- bna572 <sup>20</sup>                         | Allowable range of fluxes (FVA)                                                               | Quantitative analysis of reaction contributions during storage metabolism using flux variabilities                                                                                           |

## References:

1. Poolman, M. G.; Miguet, L.; Sweetlove, L. J.; Fell, D. A. A Genome-Scale Metabolic Model of Arabidopsis and Some of Its Properties. *Plant Physiol.* **2009**, *151* (3), 1570–1581. <https://doi.org/10.1104/pp.109.141267>.
2. Williams, T. C. R.; Poolman, M. G.; Howden, A. J. M.; Schwarzlander, M.; Fell, D. a.; Ratcliffe, R. G.; Sweetlove, L. J. A Genome-Scale Metabolic Model Accurately Predicts Fluxes in Central Carbon Metabolism under Stress Conditions. *Plant Physiol.* **2010**, *154* (1), 311–323. <https://doi.org/10.1104/pp.110.158535>.
3. Cheung, C. Y. M.; Williams, T. C. R.; Poolman, M. G.; Fell, D. A.; Ratcliffe, R. G.; Sweetlove, L. J. A Method for Accounting for Maintenance Costs in Flux Balance Analysis Improves the Prediction of Plant Cell Metabolic Phenotypes under Stress Conditions. *Plant J.* **2013**, *75* (6), 1050–1061. <https://doi.org/10.1111/tpj.12252>.
4. de Oliveira Dal'Molin, C. G.; Quek, L.-E.; Palfreyman, R. W.; Brumbley, S. M.; Nielsen, L. K. AraGEM, a Genome-Scale Reconstruction of the Primary Metabolic Network in Arabidopsis. *Plant Physiol.* **2010**, *152* (2), 579–589. <https://doi.org/10.1104/pp.109.148817>.
5. Wang, C.; Guo, L.; Li, Y.; Wang, Z. Systematic Comparison of C3 and C4 Plants Based on Metabolic Network Analysis. *BMC Syst. Biol.* **2012**, *6* (Suppl 2), S9. <https://doi.org/10.1186/1752-0509-6-S2-S9>.
6. Mintz-Oron, S.; Meir, S.; Malitsky, S.; Ruppin, E.; Aharoni, A.; Shlomi, T. Reconstruction of Arabidopsis Metabolic Network Models Accounting for Subcellular Compartmentalization and Tissue-Specificity. *Proc. Natl. Acad. Sci.* **2012**, *109* (1), 339–344. <https://doi.org/10.1073/pnas.1100358109>.
7. Arnold, A.; Nikoloski, Z. Bottom-up Metabolic Reconstruction of Arabidopsis and Its Application to Determining the Metabolic Costs of Enzyme Production. *PLANT Physiol.* **2014**, *165* (3), 1380–1391. <https://doi.org/10.1104/pp.114.235358>.
8. Poolman, M. G.; Kundu, S.; Shaw, R.; Fell, D. A. Responses to Light Intensity in a Genome-Scale Model of Rice Metabolism. *Plant Physiol.* **2013**, *162* (2), 1060–1072. <https://doi.org/10.1104/pp.113.216762>.
9. Lakshmanan, M.; Zhang, Z.; Mohanty, B.; Kwon, J.Y.; Choi, H.Y.; Nam, H.J.; Kim, D.I.; Lee, D.-Y. Elucidating Rice Cell Metabolism under Flooding and Drought Stresses Using Flux-Based Modeling and Analysis. *Plant Physiol.* **2013**, *162* (4), 2140–2150. <https://doi.org/10.1104/pp.113.220178>.
10. Lakshmanan, M.; Lim, S.H.; Mohanty, B.; Kim, J. K.; Ha, S.H.; Lee, D.Y. Unraveling the Light-Specific Metabolic and Regulatory Signatures of Rice through Combined in Silico Modeling and Multi-Omics Analysis. *Plant Physiol.* **2015**, *169* (4), pp.01379.2015. <https://doi.org/10.1104/pp.15.01379>
11. Colombié, S.; Nazaret, C.; Bénard, C.; Biais, B.; Mengin, V.; Solé, M.; Fouillen, L.; Dieuaide-Noubhani, M.; Mazat, J.-P.; Beauvoit, B.; Gibon, Y. Modelling Central Metabolic Fluxes by Constraint-Based Optimization Reveals Metabolic Reprogramming of Developing *Solanum Lycopersicum* (Tomato) Fruit. *Plant J.* **2015**, *81* (1), 24–39. <https://doi.org/10.1111/tpj.12685>.
12. Yuan, H.; Cheung, C. Y. M.; Poolman, M. G.; Hilbers, P. A. J.; van Riel, N. A. W. A Genome-Scale Metabolic Network Reconstruction of Tomato ( *Solanum Lycopersicum* L.) and Its Application to Photorespiratory Metabolism. *Plant J.* **2016**, *85* (2), 289–304. <https://doi.org/10.1111/tpj.13075>.
13. de Oliveira Dal'Molin, C. G.; Quek, L.-E.; Palfreyman, R. W.; Brumbley, S. M.; Nielsen, L. K. C4GEM, a Genome-Scale Metabolic Model to Study C4 Plant Metabolism. *PLANT Physiol.* **2010**, *154* (4), 1871–1885. <https://doi.org/10.1104/pp.110.166488>.
14. Saha, R.; Suthers, P. F.; Maranas, C. D. Zea Mays Irs1563: A Comprehensive Genome-Scale Metabolic Reconstruction of Maize Metabolism. *PLoS ONE* **2011**, *6* (7), e21784. <https://doi.org/10.1371/journal.pone.0021784>.

15. Simons, M.; Saha, R.; Amiour, N.; Kumar, A.; Guillard, L.; Clément, G.; Miquel, M.; Li, Z.; Mouille, G.; Lea, P. J.; Hirel, B.; Maranas, C. D. Assessing the Metabolic Impact of Nitrogen Availability Using a Compartmentalized Maize Leaf Genome-Scale Model. *Plant Physiol.* **2014**, *166* (3), 1659–1674. <https://doi.org/10.1104/pp.114.245787>.
16. Cañas, R. A.; Yesbergenova-Cuny, Z.; Simons, M.; Chardon, F.; Armengaud, P.; Quilleré, I.; Cukier, C.; Gibon, Y.; Limami, A. M.; Nicolas, S.; Brulé, L.; Lea, P. J.; Maranas, C. D.; Hirel, B. Exploiting the Genetic Diversity of Maize Using a Combined Metabolomic, Enzyme Activity Profiling, and Metabolic Modeling Approach to Link Leaf Physiology to Kernel Yield. *Plant Cell* **2017**, *29* (5), 919–943. <https://doi.org/10.1105/tpc.16.00613>.
17. Grafahrend-Belau, E.; Schreiber, F.; Koschützki, D.; Junker, B. H. Flux Balance Analysis of Barley Seeds: A Computational Approach to Study Systemic Properties of Central Metabolism. *Plant Physiol.* **2009**, *149* (1), 585–598. <https://doi.org/10.1104/pp.108.129635>.
18. Grafahrend-Belau, E.; Junker, A.; Eschenroder, A.; Muller, J.; Schreiber, F.; Junker, B. H. Multiscale Metabolic Modeling: Dynamic Flux Balance Analysis on a Whole-Plant Scale. *Plant Physiol.* **2013**, *163* (2), 637–647. <https://doi.org/10.1104/pp.113.224006>.
19. Pilalis, E.; Chatziioannou, A.; Thomasset, B.; Kolisis, F. An in Silico Compartmentalized Metabolic Model of Brassica Napus Enables the Systemic Study of Regulatory Aspects of Plant Central Metabolism. *Biotechnol. Bioeng.* **2011**, *108* (7), 1673–1682. <https://doi.org/10.1002/bit.23107>.
20. Hay, J.; Schwender, J. Metabolic Network Reconstruction and Flux Variability Analysis of Storage Synthesis in Developing Oilseed Rape (*Brassica Napus* L.) Embryos. *Plant J.* **2011**, *67* (3), 526–541. <https://doi.org/10.1111/j.1365-313X.2011.04613.x>.
